# Supplementary material for: LncRNA expression profiling of BMSCs in osteonecrosis of the femoral head associated with increased adipogenic and decreased osteogenic differentiation
Source: PubMed Central journal article supplement (PMC6002551; doi:10.1038/s41598-018-27501-2), 2018-06-14
Supplement: 41598_2018_27501_MOESM1_ESM.pdf [file 41598_2018_27501_MOESM1_ESM.pdf]

# LncRNA expression profiling of BMSCs in osteonecrosis of the femoral head associated with increased adipogenic and decreased osteogenic differentiation

Qingyu Wang<sup>a,b,c</sup>, Qiwei Yang<sup>b,c</sup>, Gaoyang Chen<sup>b,c</sup>, Zhenwu Du<sup>a,b,c</sup>, Ming Ren<sup>a,c</sup>, Ao Wang<sup>a</sup>, Haiyue Zhao<sup>b,c</sup>, Zhaoyan Li<sup>a,c</sup>, Guizhen Zhang<sup>\*,a,b,c</sup>, Yang Song<sup>\*,a,c</sup>

a Department of Orthopedics of the Second Hospital of Jilin University, Ziqiang Street 218, Changchun, Jilin, 130041, China

b Research Centre of the Second Hospital of Jilin University, Ziqiang Street 218, Changchun, Jilin, 130041, China

c The Engineering Research Centre of Molecular Diagnosis and Cell Treatment for Metabolic Bone Diseases of Jilin Province, Ziqiang Street 218, Changchun, Jilin, 130041, China

\* Corresponding Author:

**Guizhen Zhang**, M.D. and Ph.D., Department of Orthopedics of the Second Hospital of Jilin University, Ziqiang Street 218, Changchun, Jilin, 130041, China. Tel.: 011-86 431-88796301, Fax: 011-86 431-88796301, E-mail address: [zhangguizhenjlu@163.com](mailto:zhangguizhenjlu@163.com);

**Yang Song**, M.D., Department of Orthopedics of the Second Hospital of Jilin University, Ziqiang Street 218, Changchun, Jilin, 130041, China. Tel.: 011-86 431-88796890, Fax: 011-86 431-88796890, E-mail address: [songyangjlu@foxmail.com](mailto:songyangjlu@foxmail.com).

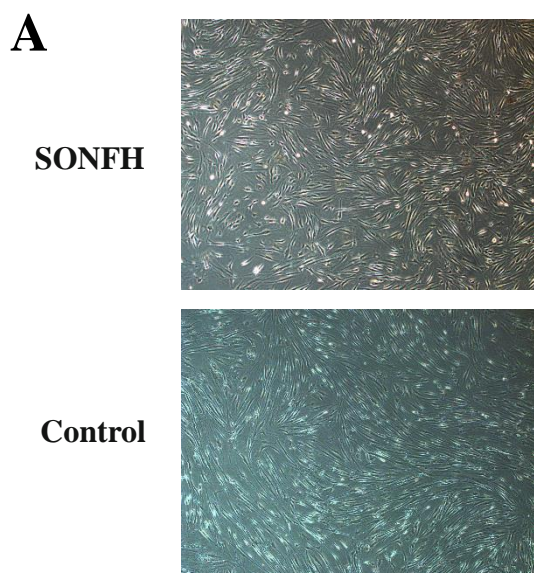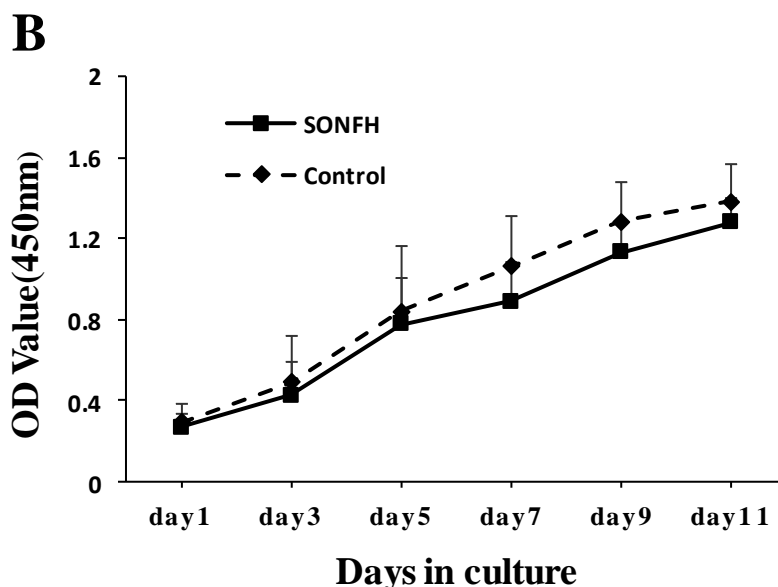

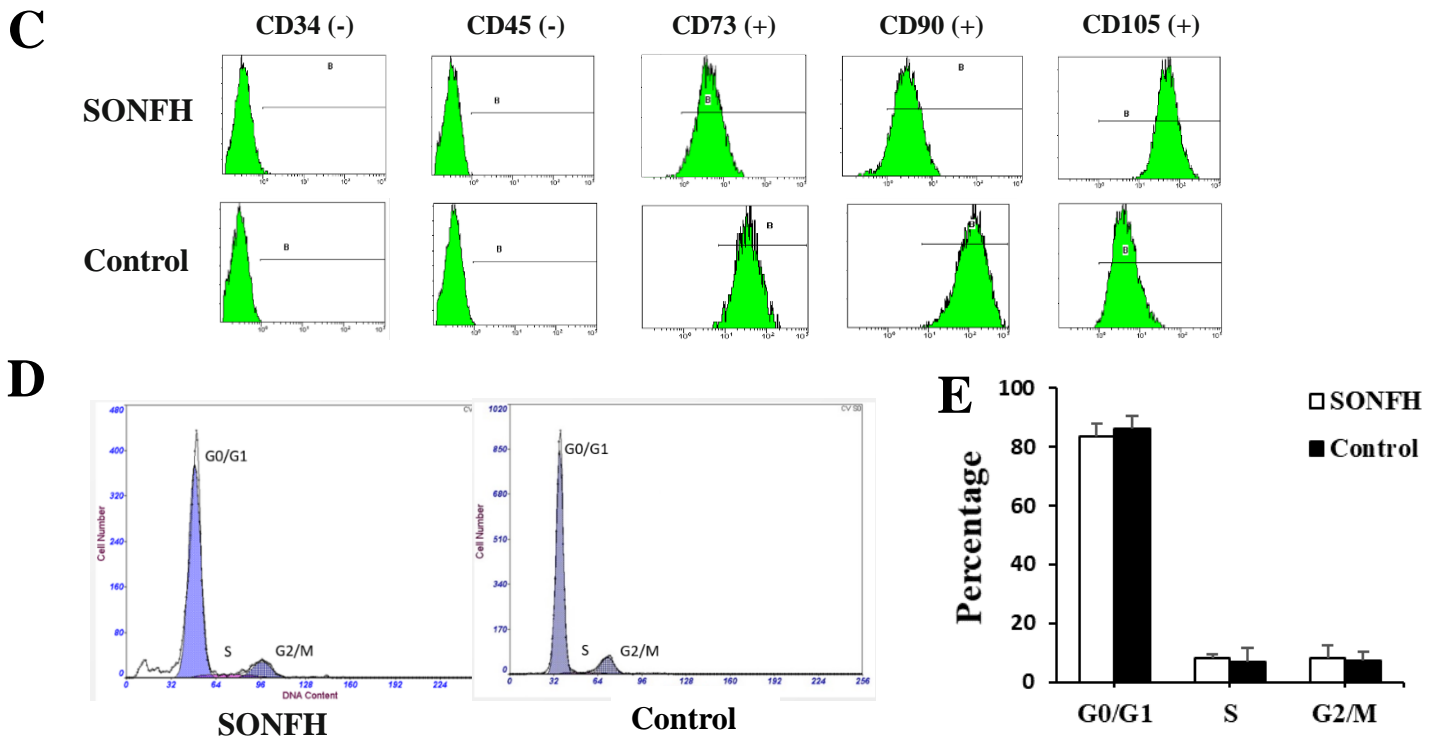

**Supplemental Figure 1. The phenotype and proliferation of BMSCs showed no significant differences between the SONFH group and control group.** (A) The morphologies of BMSCs from SONFH group and control group were identical. (B) The proliferation capacities of BMSCs from the SONFH group (n=12) and control group (n=12) had no significantly differences when cultured in growth medium for 1 to 11 days. (C) BMSCs from the SONFH group (n=7) and control group (n=7) were both positive for CD90, CD73, and CD105 and negative for CD34 and CD45, indicating a typical MSC phenotype. (D, E) The cell cycle distribution of the BMSCs in both groups had no significantly differences (n=6 in each group).

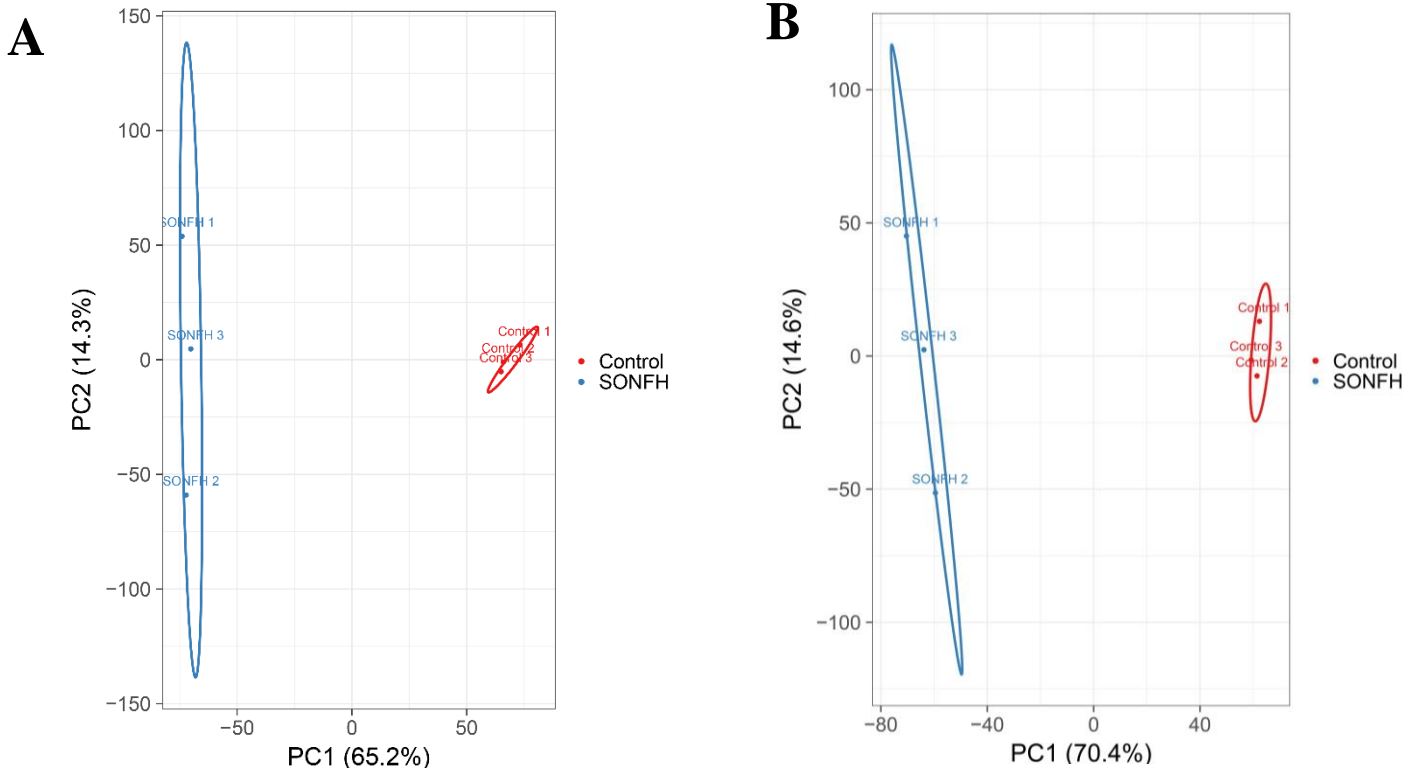

Supplemental Figure 2. PCA analysis of lncRNA(A) and mRNA(B) microarray data.

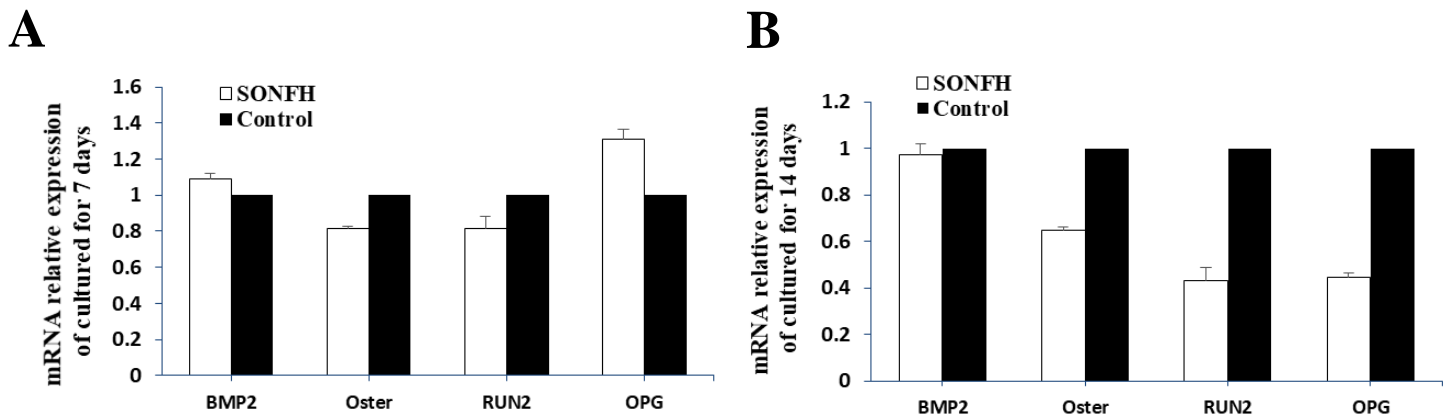

Supplemental Figure 3. The basal expression level of osteogenic markers (RUNX2, Osterix, BMP2, OPG) in BMSCs without osteogenic induction from SONFH group (n=16) and control group (n=16).

**Supplemental Table 2.** The characteristics of lncRNAs and mRNAs for validation

|        | Sequence name   | Gene Symbol         | Expression | RNA length | Chromosome | Stand | Start     | End       |
|--------|-----------------|---------------------|------------|------------|------------|-------|-----------|-----------|
| lncRNA | ENST00000437067 | RP1-67K17.3         | up         | 349        | chr6       | +     | 143069579 | 143074896 |
|        | ENST00000580645 | CTD-2006O16.2       | up         | 464        | chr18      | +     | 22882089  | 22882920  |
|        | NR_102430       | OGFR-AS1            | up         | 684        | chr20      | -     | 61431978  | 61436939  |
|        | NR_038340       | LOC100505817        | up         | 1181       | chr18      | +     | 70992175  | 71017124  |
|        | NR_047517       | HOTAIR              | up         | 2370       | chr12      | -     | 54356091  | 54368740  |
|        | ENST00000588041 | RP1-193H18.2        | down       | 2504       | chr17      | +     | 67547498  | 67550002  |
|        | NR_002819       | MALAT1              | down       | 8758       | chr11      | +     | 65265232  | 65273983  |
|        | NR_026812       | RUNX1-IT1           | down       | 1502       | chr21      | -     | 36410232  | 36411723  |
|        | ENST00000517495 | CTD-3080F16.3       | down       | 255        | chr8       | -     | 41132633  | 41134522  |
|        | ENST00000607490 | XXbac-BPGBPG55C20.3 | down       | 540        | chr6       | -     | 58228886  | 58229426  |
| mRNA   | NM_016639       | TNFRSF12A           | up         | 1048       | chr16      | +     | 3070312   | 3072383   |
|        | NM_030967       | KRTAP1-1            | up         | 903        | chr17      | -     | 39196810  | 39197713  |
|        | NM_012242       | DKK1                | up         | 1815       | chr10      | +     | 54074040  | 54077417  |
|        | NM_002521       | NPPB                | up         | 708        | chr1       | -     | 11917520  | 11918992  |
|        | NM_032598       | SPATA22             | up         | 1479       | chr17      | -     | 3343305   | 3375041   |
|        | NM_015461       | ZNF521              | down       | 4985       | chr18      | -     | 22641887  | 22932214  |
|        | NM_003012       | SFRP1               | down       | 4482       | chr8       | -     | 41119475  | 41166990  |
|        | NM_006734       | HIVEP2              | down       | 9732       | chr6       | -     | 143072603 | 143266338 |
|        | NM_002825       | PTN                 | down       | 1558       | chr7       | -     | 136912091 | 137028546 |
|        | NM_144715       | EFHB                | down       | 2857       | chr3       | -     | 19920965  | 19975706  |

**Supplemental Table 4.** Primers for mRNAs and lncRNAs in real-time RT-PCR analysis

| Gene                | Primer sequences                      |                                       |
|---------------------|---------------------------------------|---------------------------------------|
| RUNX2               | F: 5'- AGATGGGACTGTGGTTACTG-3'        | R: 5'- GTAGCTACTTGGGGAGGATT-3'        |
| BMP2                | F: 5'- GGAATGACTGGATTGTGGCT-3'        | R: 5'- TGAGTTCGTGCGGGACACAG-3'        |
| OPG                 | F: 5'- CACTCCTCGCCCTATTGGC-3'         | R: 5'- CCCTCCTGCTTGGACACAAAG-3'       |
| PPAR $\gamma$       | F: 5'- GAGCCCAAGTTTGAGTTTGC-3'        | R: 5'- CTGTGAGGACTCAGGGTGGT-3'        |
| C/EBP $\alpha$      | F: 5'- GGGCAAGGCCAAGAAGTC -3'         | R: 5'- TTGTCACTGGTCAGCTCCAG -3'       |
| Adipsin             | F: 5'- TGCTACAGCTGTGCGAGAAG -3'       | R: 5'- ATGACTTCATTGCTCGGGAC -3'       |
| EFHB                | F: 5'- ATCAATGCAATTGTAGGAGCCATTC -3'  | R: 5'- TGAATATGCACTACCTTCTTCCACCA -3' |
| PTN                 | F: 5'- GTAATTGAGTCAAAGGCAGGATCAG -3'  | R: 5'- CTCTCTCCACTTTGGATTTTCCTCT -3'  |
| SFRP1               | F: 5'- CTACATTTGCAACTTGTGGTGTG -3'    | R: 5'- GACAGAAAGAACTACTCTGGACCT -3'   |
| HIVEP2              | F: 5'- TAAACATACAGCCACTAGATTTCCAG -3' | R: 5'- ACGCTTCTGTTATCTCATATCAA-3'     |
| ZNF521              | F: 5'- CTTTAAATCATGCCCTCTGTCTGT-3'    | R: 5'- TCCGGTAGTCCACATAATAATGGAAA-3'  |
| KRTAP1-1            | F: 5'- CTGAACTCCAGTACCTATAACTGGG-3'   | R: 5'- TCTTTTACATTGTAGGACTTTGGC-3'    |
| SPATA22             | F: 5'- AAAGACTGTGCGTTGATACCAAAC-3'    | R: 5'- ATTTAGGCTTCGCTTCATTTCCCTTC-3'  |
| NPPB                | F: 5'- TTCTGATTCCACAAGGGGCTTTTC-3'    | R: 5'- TTGTGCTCAAAGTAAGAAACCATC-3'    |
| TNFRSF12A           | F: 5'- AACAGAAAGGGAGCCTCACG -3'       | R: 5'- GTGGGGCCTAGTGTCAAGTC -3'       |
| DKK1                | F: 5'- ACCTTCTGGTCCAAGATCTGTAAA-3'    | R: 5'- ACGCTGGAATATTTCTAGTCCATGA-3'   |
| GAPDH               | F: 5'- CGGACCAATACGACCAAATCCG-3'      | R: 5'- AGCCACATCGCTCAGACACC-3'        |
| RP1-193H18.2        | F: 5'- AGGTGGATTTCTCAGCTTTCTTTG-3'    | R: 5'- AGGTAAGAAAACGTGTTGTTGTGT-3'    |
| XXbac-BPGBPG55C20.3 | F: 5'- ACAGAAGGTACTGACTTATTTGGTGT-3'  | R: 5'- GACTGAAGTGAGGGATTTAGGAGAA-3'   |
| MALAT1              | F: 5'- TGCAGTTTTAAGCAGTCGATTTGT-3'    | R: 5'- GCTTGTTTGGAATGTTTCTTGTCCAC-3'  |
| CTD-3080F16.3       | F: 5'- GAATCATAAAGCTCTGGGTAGGGAA-3'   | R: 5'- AACTGGAAGAGACGTTAAATCTGGT-3'   |
| RUNX1-IT1           | F: 5'- CTAGCAGACACTTCTCCTAATCCTC-3'   | R: 5'- ATATACATTGCCCTGCCTAATGAGT-3'   |

|               |                                     |                                     |
|---------------|-------------------------------------|-------------------------------------|
| OGFR-AS1      | F: 5'- GGTAACAAAAGTAACAAGCGGAGG-3'  | R: 5'- CTTTATGTAATGCACACTCCACCAT-3' |
| LOC100505817  | F: 5'- CAAGGAGAAACTGAAGAGCAAGAAG-3' | R: 5'- CTCAAACCTTTTCAGGCACATAAGG-3' |
| HOTAIR        | F: 5'- AAAAAGCTTGGGTTATAGGAAAGCC-3' | R: 5'- GCTTCTATGTTCCCTCTCAAATCCG-3' |
| RP1-67K17.3   | F: 5'- TTCGGTGCCAAGTAGAATAATTTCC-3' | R: 5'- CAGCCCAGACTTTATATGCAACAAT-3' |
| CTD-2006O16.2 | F: 5'- TTGTTTATAGATGCTGGGAAAGGC-3'  | R: 5'- ATTACTCCTGCTTCTTACTGGTGT-3'  |

---

EFHB, EF-hand domain family member B; PTN, pleiotrophin; SFRP1, secreted frizzled related protein 1; ZNF521, zinc finger protein 521; KRTAP1-1 ,keratin associated protein 1-1; SPATA22, spermatogenesis associated 22; NPPB, natriuretic peptide B; TNFRSF12A, TNF receptor superfamily member 12a; DKK1, dickkopf WNT signaling pathway inhibitor 1. GAPDH, glyceraldehyde-3-phosphate dehydrogenase. MALAT1, Metastasis-associated lung adenocarcinoma transcript 1. RUNX1-IT1, RUNX1 intronic transcript 1. OGFR-AS1, OGFR antisense RNA 1. HOTAIR, HOX transcript antisense RNA
